# Supplementary material
Source: Springer Nature journal article supplement (https://springermedizin.de/resource/supplementary/13063_2011_652_MOESM2_ESM.pdf/9618420)
Supplement: MOESM2 [file 9618420]

Informed Consent Obtained: Baseline Measures (Chart Review, APOE & LEQ) (N=256)

Randomized to Conditions

RESERVE-DSD (N=128)  
Duration: up to 30 days or discharge

Usual Care (N=128)  
Duration: up to 30 days or discharge

Measures: CAM, DRS, BI, Executive Function, Abstract Thinking, Memory, Orientation, Attention

3-Month Follow-Up: Delirium, Mental Status, Living arrangements

RESERVE-DSD and Usual Care  
(N=256) Analyzed
